# Supplementary material for: The Neuronal Overexpression of Gclc in Drosophila melanogaster Induces Life Extension With Longevity-Associated Transcriptomic Changes in the Thorax
Source: Front Genet. 2019 Mar 5;10:149. doi: 10.3389/fgene.2019.00149 (PMC6411687; doi:10.3389/fgene.2019.00149)
Supplement: Supplementary file 1 [file Table_1.XLSX]

## Sheet: Лист2
Supplementary Table 1. Down- and up-regulated genes associated with the activation of Gclc in Drosophila melanogaster.
Gene ID	Symbol	Biotype	Annotation	LogFC	LogCPM	p (QLF test)
FBgn0052581	CG32581	protein_coding	dme04141 (Protein processing in endoplasmic reticulum), GO:0016567 (protein ubiquitination), GO:0005575 (cellular_component), GO:0004842 (ubiquitin-protein transferase activity), GO:0008270 (zinc ion binding)	6.85392	1.90447	1.74698e-17
FBgn0033395	Cyp4p2	protein_coding	GO:0030431 (sleep), GO:0055114 (oxidation-reduction process), GO:0005506 (iron ion binding), GO:0016705 (oxidoreductase activity, acting on paired donors, with incorporation or reduction of molecular oxygen), GO:0020037 (heme binding)	3.53789	2.4781	1.04075e-17
FBgn0003996	w	protein_coding	GO:0006727 (ommochrome biosynthetic process), GO:0006856 (eye pigment precursor transport), GO:0007613 (memory), GO:0008049 (male courtship behavior), GO:0042332 (gravitaxis), GO:0042401 (cellular biogenic amine biosynthetic process), GO:0042441 (eye pigment metabolic process), GO:0048072 (compound eye pigmentation), GO:0070731 (cGMP transport), GO:0016020 (membrane), GO:0031410 (cytoplasmic vesi…	5.58867	1.50361	8.56258e-17
FBgn0267165	CR45605	ncRNA		6.43448	2.34477	1.17508e-13
FBgn0034517	Cpr57A	protein_coding	GO:0040003 (chitin-based cuticle development), GO:0031012 (extracellular matrix), GO:0008010 (structural constituent of chitin-based larval cuticle), GO:0042302 (structural constituent of cuticle)	1.21451	3.34779	5.60376e-11
FBgn0042701	CR12628	pseudogene		2.8465	1.39092	4.64016e-10
FBgn0050148	CG30148	protein_coding	GO:0030246 (carbohydrate binding)	1.29662	1.51934	6.27909e-10
FBgn0267472	CR45822	ncRNA		2.10797	-0.33179	6.01574e-08
FBgn0261549	rdgA	protein_coding	dme00564 (Glycerophospholipid metabolism), dme04070 (Phosphatidylinositol signaling system), dme00561 (Glycerolipid metabolism), dme01100 (Metabolic pathways), GO:0006654 (phosphatidic acid biosynthetic process), GO:0006661 (phosphatidylinositol biosynthetic process), GO:0007015 (actin filament organization), GO:0007205 (protein kinase C-activating G-protein coupled receptor signaling pathway), G…	1.01599	1.43137	1.81791e-07
FBgn0031690	CG7742	protein_coding	GO:0043087 (regulation of GTPase activity), GO:0005096 (GTPase activator activity)	-1.29599	2.61213	6.35768e-06
FBgn0039315	CG13658	protein_coding		-1.12646	2.27371	1.73772e-05
FBgn0051427	CR31427	pseudogene	GO:0006508 (proteolysis), GO:0008237 (metallopeptidase activity), GO:0008270 (zinc ion binding)	1.08691	0.410324	2.55794e-05
FBgn0037548	CG7900	protein_coding	GO:0004040 (amidase activity)	1.62991	-0.537621	6.61061e-05
FBgn0010357	betaTry	protein_coding	dme04080 (Neuroactive ligand-receptor interaction), GO:0006508 (proteolysis), GO:0004252 (serine-type endopeptidase activity)	-1.50521	9.27045	0.000151124
FBgn0025709	CNT2	protein_coding	GO:1901642 (nucleoside transmembrane transport), GO:0016020 (membrane), GO:0005337 (nucleoside transmembrane transporter activity)	-1.31913	1.35832	0.000194039
FBgn0031109	Obp19a	protein_coding	GO:0007606 (sensory perception of chemical stimulus), GO:0019236 (response to pheromone), GO:0042048 (olfactory behavior), GO:0005576 (extracellular region), GO:0005549 (odorant binding)	-1.63925	-0.209756	0.000436493
FBgn0262357	CG43055	protein_coding	GO:0043152 (induction of bacterial agglutination), GO:0005576 (extracellular region), GO:0005534 (galactose binding)	-1.54512	5.39908	0.000270586
FBgn0053105	p24-2	protein_coding	GO:0000003 (reproduction), GO:0006810 (transport), GO:0048042 (regulation of post-mating oviposition), GO:0048193 (Golgi vesicle transport), GO:0016021 (integral component of membrane), GO:0005215 (transporter activity)	-1.59883	-0.711269	0.000555597
FBgn0040531	CG11741	protein_coding	GO:0008150 (biological_process), GO:0005575 (cellular_component), GO:0003674 (molecular_function)	-1.19638	1.26281	0.000918844
FBgn0034122	CG15711	protein_coding		-1.28667	0.425662	0.000706421
FBgn0265378	CR44319	ncRNA		1.2563	-0.820121	0.000449552
FBgn0266637	CR45144	ncRNA		1.42205	-0.127705	0.000888944
FBgn0038009	CG17738	protein_coding		-1.12533	1.34376	0.000772381
FBgn0035665	Jon65Aiii	protein_coding	GO:0006508 (proteolysis), GO:0004175 (endopeptidase activity), GO:0004252 (serine-type endopeptidase activity)	-1.01556	9.27237	0.000477076
FBgn0043575	PGRP-SC2	protein_coding	dme04624 (Toll and Imd signaling pathway), GO:0006955 (immune response), GO:0009253 (peptidoglycan catabolic process), GO:0045824 (negative regulation of innate immune response), GO:0005576 (extracellular region), GO:0008270 (zinc ion binding), GO:0008745 (N-acetylmuramoyl-L-alanine amidase activity), GO:0042834 (peptidoglycan binding), R-DME-168249 (Drosophila melanogaster: Innate Immune System)…	-1.00464	5.25072	0.00198928
FBgn0051259	CG31259	protein_coding	GO:0007031 (peroxisome organization), GO:0005777 (peroxisome), GO:0003674 (molecular_function)	-1.82402	1.10445	0.00120151
FBgn0033215	CG1942	protein_coding	dme00561 (Glycerolipid metabolism), GO:0007498 (mesoderm development), GO:0016747 (transferase activity, transferring acyl groups other than amino-acyl groups)	-1.1963	1.4309	0.00255135
FBgn0034850	CG9875	protein_coding		-1.2744	0.685833	0.0027456
FBgn0261575	tobi	protein_coding	dme00500 (Starch and sucrose metabolism), dme00052 (Galactose metabolism), dme01100 (Metabolic pathways), GO:0005975 (carbohydrate metabolic process), GO:0004553 (hydrolase activity, hydrolyzing O-glycosyl compounds)	-1.0778	6.89987	0.00600389
FBgn0265053	CR44168	ncRNA		-1.62087	3.63292	0.00382432
FBgn0020906	Jon25Bi	protein_coding	GO:0006508 (proteolysis), GO:0004175 (endopeptidase activity), GO:0004252 (serine-type endopeptidase activity)	-1.95454	5.25075	0.00309497
FBgn0034317	CG14499	protein_coding		-1.97317	0.830413	0.00639697
FBgn0262007	CG42825	protein_coding	GO:0055085 (transmembrane transport), GO:0016021 (integral component of membrane), GO:0022857 (transmembrane transporter activity)	-1.06898	2.75766	0.00544483
FBgn0052185	edin	protein_coding	GO:0006959 (humoral immune response), GO:0050829 (defense response to Gram-negative bacterium), GO:0050830 (defense response to Gram-positive bacterium), GO:0005576 (extracellular region), GO:0005615 (extracellular space), GO:0003674 (molecular_function)	-2.76857	1.79246	0.00136766
FBgn0012042	AttA	protein_coding	GO:0006959 (humoral immune response), GO:0019731 (antibacterial humoral response), GO:0030431 (sleep), GO:0042742 (defense response to bacterium), GO:0050829 (defense response to Gram-negative bacterium), GO:0050830 (defense response to Gram-positive bacterium), GO:0055093 (response to hyperoxia), GO:0005615 (extracellular space)	-1.54279	5.25756	0.00623518
FBgn0010425	epsilonTry	protein_coding	dme04080 (Neuroactive ligand-receptor interaction), GO:0006508 (proteolysis), GO:0004252 (serine-type endopeptidase activity)	-1.33293	6.399	0.00671646
FBgn0031654	Jon25Bii	protein_coding	GO:0006508 (proteolysis), GO:0022008 (neurogenesis), GO:0004252 (serine-type endopeptidase activity)	-1.77181	4.9637	0.00679545
FBgn0085799				1.59565	0.807178	0.00359653
FBgn0051041	CG31041	protein_coding	GO:0008150 (biological_process), GO:0005575 (cellular_component), GO:0003674 (molecular_function)	-1.77641	1.27662	0.0080392
FBgn0038484	CG5246	protein_coding	GO:0006508 (proteolysis), GO:0004252 (serine-type endopeptidase activity)	-1.44206	1.29449	0.00902917
FBgn0031701	TotM	protein_coding	GO:0009617 (response to bacterium), GO:0034605 (cellular response to heat), GO:0050830 (defense response to Gram-positive bacterium), GO:0005576 (extracellular region), GO:0005615 (extracellular space), GO:0003674 (molecular_function)	-1.18113	4.24853	0.0102473
FBgn0034318	CG14500	protein_coding	GO:0030246 (carbohydrate binding)	-1.09395	1.78133	0.0152836
FBgn0264987	CR44138	ncRNA		-1.18092	0.574993	0.00950291
FBgn0032066	LManIII	protein_coding	dme04142 (Lysosome), dme00511 (Other glycan degradation), GO:0006013 (mannose metabolic process), GO:0004559 (alpha-mannosidase activity), GO:0008270 (zinc ion binding), GO:0030246 (carbohydrate binding)	-1.71471	1.7569	0.0165417
FBgn0050272	MFS1	protein_coding	GO:0055085 (transmembrane transport), GO:0016021 (integral component of membrane)	-1.7383	-0.196486	0.017547
FBgn0003356	Jon99Cii	protein_coding	GO:0006508 (proteolysis), GO:0004252 (serine-type endopeptidase activity), GO:0006508 (proteolysis), GO:0004252 (serine-type endopeptidase activity)	-1.1273	7.21081	0.0105626
FBgn0031034	CG14205	protein_coding	GO:0016747 (transferase activity, transferring acyl groups other than amino-acyl groups)	-1.94786	1.55987	0.00596068
FBgn0031623	Taf12L	protein_coding	dme03022 (Basal transcription factors), GO:0006367 (transcription initiation from RNA polymerase II promoter), GO:0001673 (male germ cell nucleus), GO:0005669 (transcription factor TFIID complex), GO:0046982 (protein heterodimerization activity)	-1.77639	0.517102	0.0147136
FBgn0039470	CG6296	protein_coding	GO:0016042 (lipid catabolic process), GO:0005575 (cellular_component), GO:0008970 (phosphatidylcholine 1-acylhydrolase activity), GO:0016298 (lipase activity)	-1.21623	0.514415	0.0239145
FBgn0038082	CG5724	protein_coding	dme00040 (Pentose and glucuronate interconversions), dme00982 (Drug metabolism - cytochrome P450), dme00980 (Metabolism of xenobiotics by cytochrome P450), dme00860 (Porphyrin and chlorophyll metabolism), dme00053 (Ascorbate and aldarate metabolism), dme01100 (Metabolic pathways), dme00830 (Retinol metabolism), dme00983 (Drug metabolism - other enzymes), GO:0008152 (metabolic process), GO:0016758…	-1.21504	2.48383	0.0139229
FBgn0041581	AttB	protein_coding	GO:0006952 (defense response), GO:0006959 (humoral immune response), GO:0019233 (sensory perception of pain), GO:0019731 (antibacterial humoral response), GO:0042742 (defense response to bacterium), GO:0050830 (defense response to Gram-positive bacterium), GO:0005576 (extracellular region), GO:0005615 (extracellular space)	-1.48283	4.82337	0.0119747
FBgn0267519	28SrRNA-Psi:CR45859	pseudogene		-1.35581	3.10787	0.0411184
FBgn0010388	Dro	protein_coding	GO:0006952 (defense response), GO:0009617 (response to bacterium), GO:0019731 (antibacterial humoral response), GO:0042742 (defense response to bacterium), GO:0050829 (defense response to Gram-negative bacterium), GO:0050830 (defense response to Gram-positive bacterium), GO:0005576 (extracellular region)	-1.33833	5.19307	0.0322863
FBgn0264549	CR43928	ncRNA		-1.17055	-0.109628	0.0277859
FBgn0028519	hll	protein_coding	dme01100 (Metabolic pathways), dme00061 (Fatty acid biosynthesis), dme00071 (Fatty acid degradation), dme01212 (Fatty acid metabolism), GO:0001676 (long-chain fatty acid metabolic process), GO:0006631 (fatty acid metabolic process), GO:0007498 (mesoderm development), GO:0030431 (sleep), GO:0031987 (locomotion involved in locomotory behavior), GO:0070050 (neuron cellular homeostasis), GO:0070328 (…	1.25116	2.36927	0.0514067
FBgn0003983	Vm34Ca	protein_coding		3.32813	3.14787	0.00668453
FBgn0263080	CG43348	protein_coding	GO:0008150 (biological_process), GO:0005575 (cellular_component), GO:0003674 (molecular_function)	1.18915	2.55486	0.0269452
FBgn0036468	CG13461	protein_coding		-1.5417	0.462379	0.0228276
This table shows genes with statistically significant differential expression between transgenic flies of all ages and genders and control flies of the respective groups (p < 0.05, |LogFC|>1). FC - Fold Change, CPM - Counts per Million.
